# Supplementary material for: MiR-129 blocks estrogen induction of NOTCH signaling activity in breast cancer stem-like cells
Source: PubMed Central journal article supplement (PMC5732725; doi:10.18632/oncotarget.21143), 2017-09-21
Supplement: oncotarget-08-103261-s001.pdf [file oncotarget-08-103261-s001.pdf]

Supplementary Table 1: Clinicopathologic characteristics of patients

| Characteristic                   | Number (%) |
|----------------------------------|------------|
| <b>Total</b>                     | 42(100%)   |
| <b>Age(years)</b>                |            |
| <55                              | 18(43%)    |
| ≥55                              | 24(57%)    |
| <b>Gender</b>                    |            |
| male                             | 0(0%)      |
| female                           | 42(100%)   |
| <b>Tumor size(cm)</b>            |            |
| ≤ 3                              | 20(48%)    |
| >3                               | 22(52%)    |
| <b>TNM tumor stage</b>           |            |
| I+II                             | 28(67%)    |
| III+IV                           | 14(33%)    |
| <b>Degree of differentiation</b> |            |
| Well and moderately              | 30(71%)    |
| Poorly                           | 12(29%)    |
| <b>Lymph node metastasis</b>     |            |
| Yes                              | 6 (14%)    |
| No                               | 36(86%)    |
| <b>Neoadjuvant chemotherapy</b>  |            |
| Yes                              | 15(36%)    |
| No                               | 27(64%)    |
